# Supplementary material for: A novel prognostic nomogram for patients with surgically resected perihilar cholangiocarcinoma: a SEER-based study
Source: PubMed Central journal article supplement — Ann Transl Med. 2021 Jan;9(1):54. doi: 10.21037/atm-20-3130 (PMC7859751; doi:10.21037/atm-20-3130), 2021-01
Supplement: atm-09-01-54-supplementary.pdf [file atm-09-01-54-supplementary.pdf]

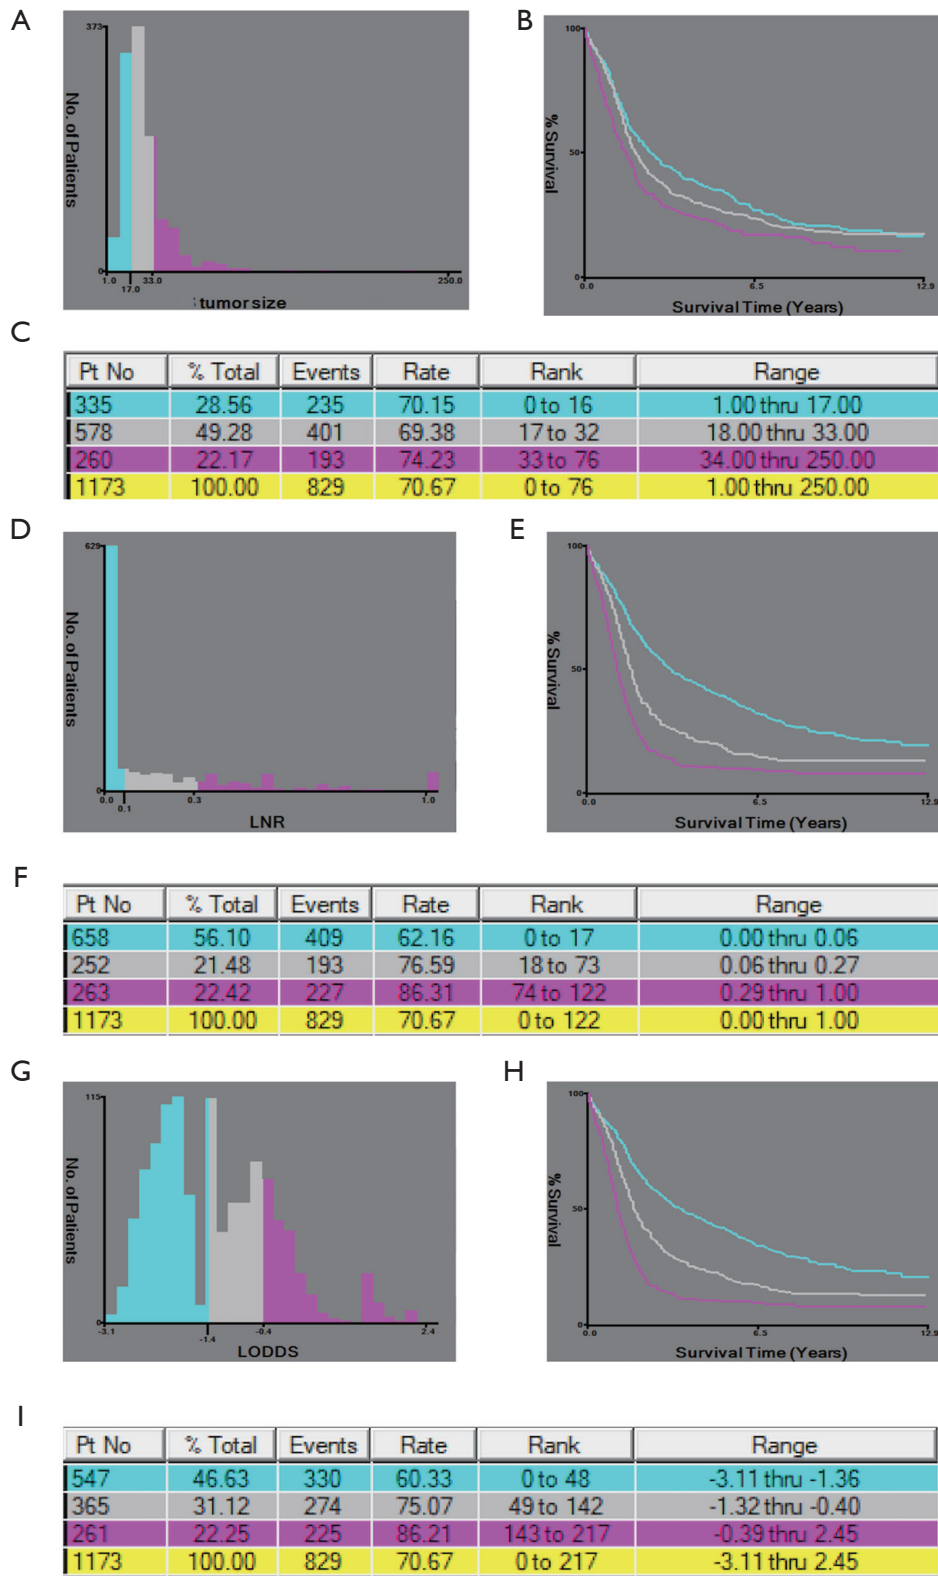

**Figure S1** X-tile plots identifying the cut-off of tumor size (A,B,C), LNR (D,E,F), LODDS (G,H,I). LNR, lymph node ratio; LODDS, log odds of positive lymph nodes.
